# Supplementary figures and images for: Systematic identification of gene family regulators in mouse and human embryonic stem cells
Source: PubMed Central journal article supplement — Nucleic Acids Res. 2016 Apr 15;44(9):4080–9. doi: 10.1093/nar/gkw259 (PMC4872113; doi:10.1093/nar/gkw259), 2016-04-15

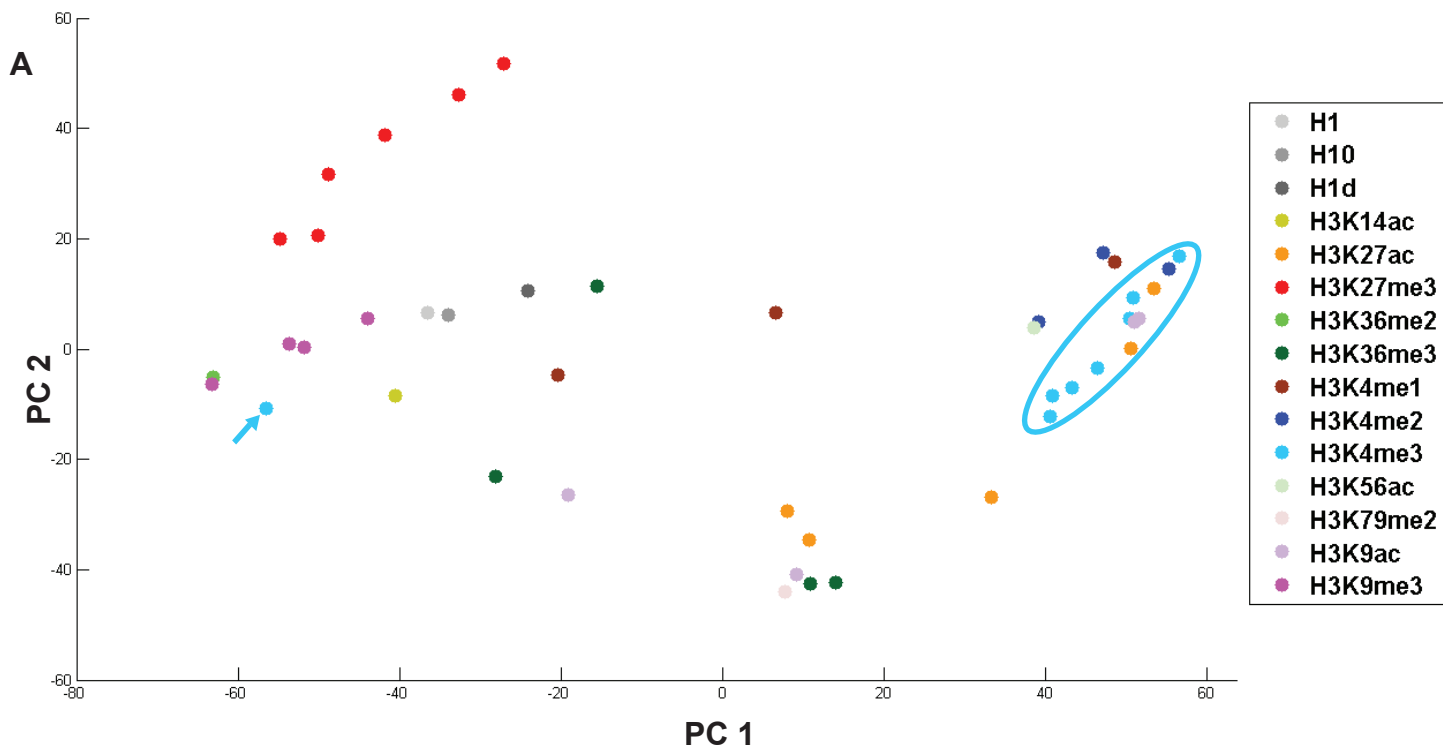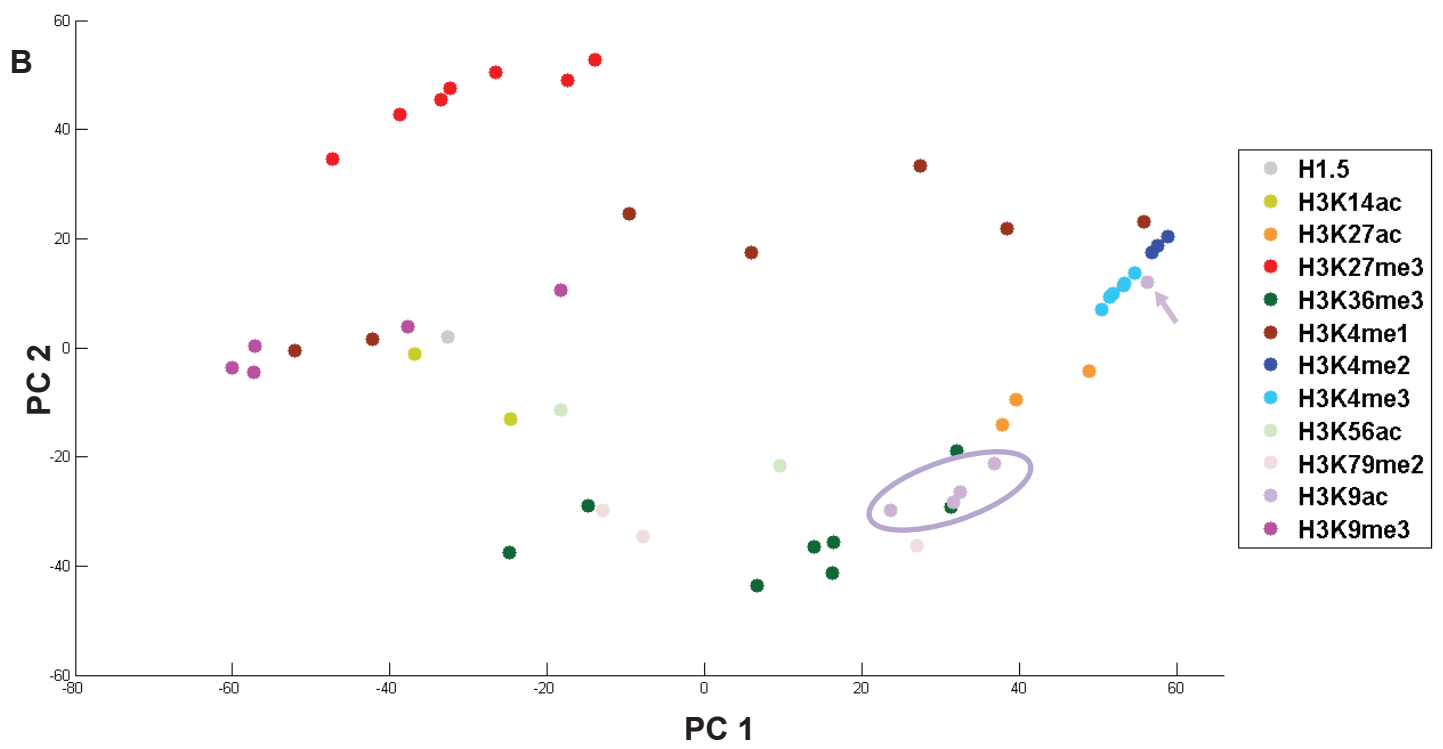

Supplement: supp_gkw259_nar-03389-h-2015-File009.pdf [file supp_gkw259_nar-03389-h-2015-File009.pdf]

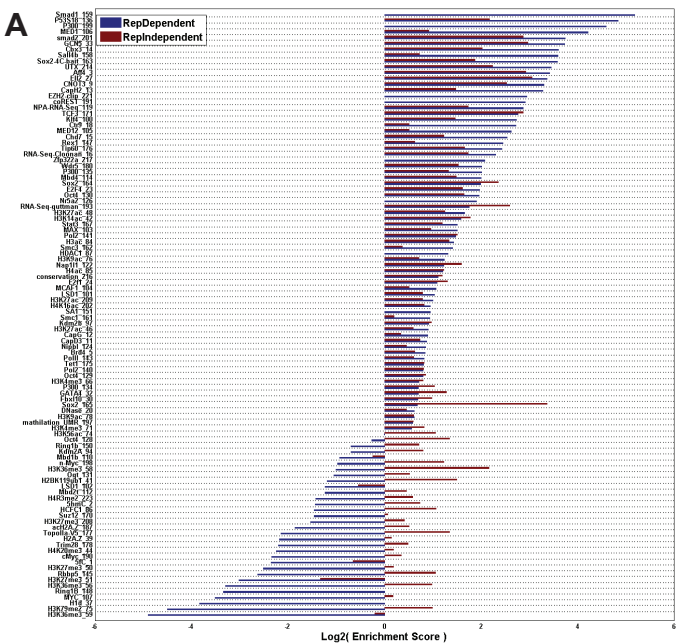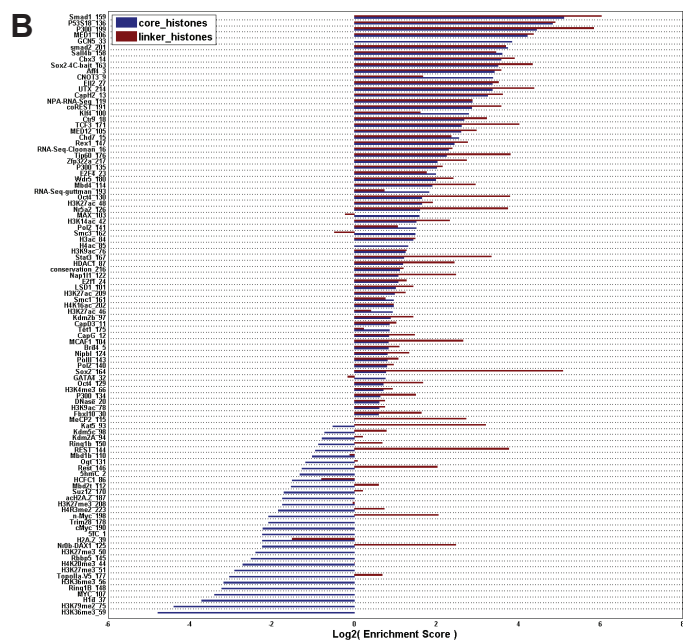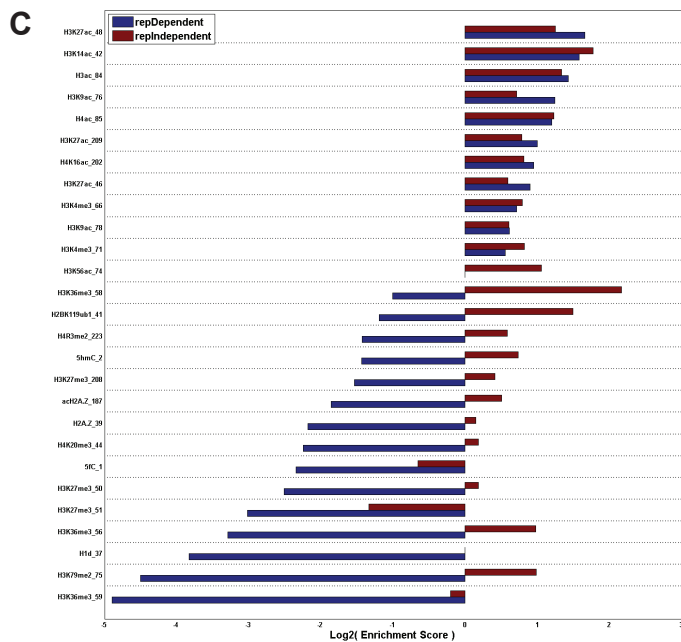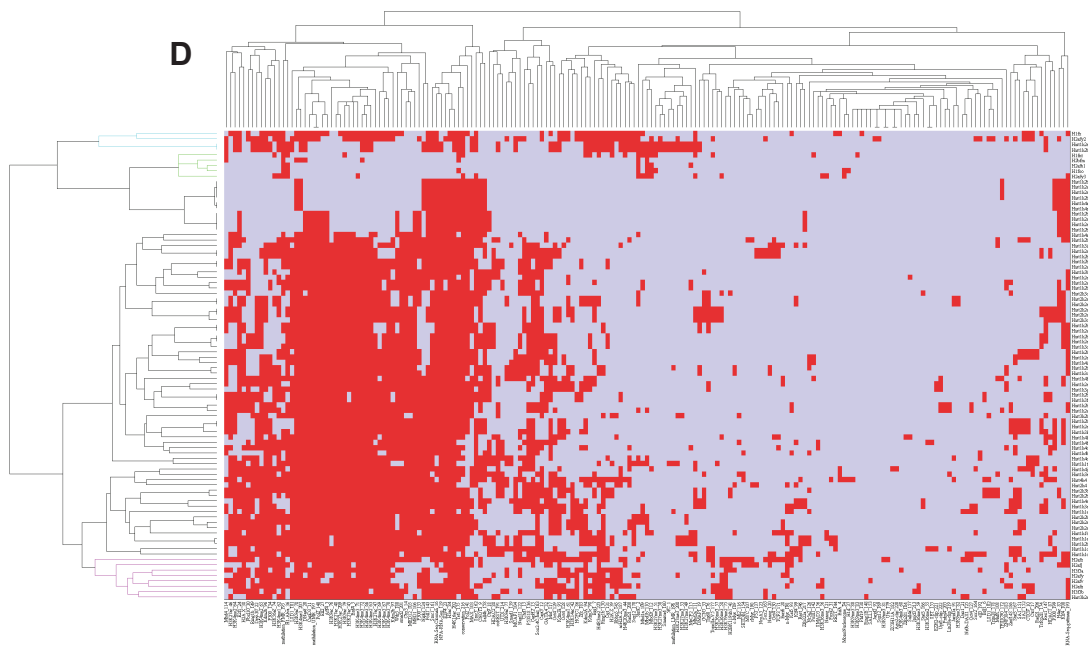

Supplement: supp_gkw259_nar-03389-h-2015-File010.pdf [file supp_gkw259_nar-03389-h-2015-File010.pdf]
